# Supplementary material
Source: PubMed Central journal article supplement (PMC3669660)
Supplement: NIHMS456351-supplement-01.pdf [file NIHMS456351-supplement-01.pdf]

## SUPPLEMENTARY DATA

### Biochemical analysis of active site mutations of human polymerase $\eta$

Samuel C. Suarez, Renee A. Beardslee, Shannon M. Toffton, and Scott D. McCulloch\*

\*scott\_mcculloch@ncsu.edu

#### Table of Contents

**Supplementary Table 1** – Primer sequences used in site-directed mutagenesis reactions to generate single amino acid mutants in the catalytic core of human DNA polymerase  $\eta$  (amino acids 1-511). Sequence differences compared to wild type are underlined.

**Supplementary Table 2** – Base substitution error spectrum of truncated pol  $\eta$  mutants as calculated from forward gap filling assay. Values given are the calculated frequency of errors per 10,000 bases copied. Rates relative to wild type are given in parentheses. Values in red indicate rates greater than 5 fold above wild type rate. Values in green are rate less than 5 fold the wild type rate. For changes that were not observed, rates were calculated as if a single instance was found and the values presented as less than or equal to ( $\leq$ ) values.

**Supplementary Table 1** – Primer sequences used in site-directed mutagenesis reactions to generate single amino acid mutants in the catalytic core of human DNA polymerase  $\eta$  (amino acids 1-511). Sequence differences compared to wild type are underlined.

| <b>Mutant</b> | <b>Forward Primer</b>                              | <b>Reverse Primer</b>                              |
|---------------|----------------------------------------------------|----------------------------------------------------|
| <b>M14V</b>   | 5'-GTGGTTGCTCTCGTGGAC <u>G</u> TGGACTGTTTTTTGTTTC  | 5'-GAACAAAAAACAGTCCAC <u>G</u> TCCACGAGAGCAACCAC   |
| <b>F17L</b>   | 5'-GTGGACATGGACTGTTT <u>G</u> TTTGTTC AAGTGGAG     | 5'-CTCCACTTGAACAAA <u>A</u> AAACAGTCCATGTCCAC      |
| <b>Q38A</b>   | 5'-CCTTGTGCAGTTGTAG <u>C</u> GTACAAATCATGG         | 5'-CCATGATTTGTAG <u>G</u> CTACAACGCACAAGG          |
| <b>Q38V</b>   | 5'-CCTTGTGCAGTTGTAG <u>T</u> GTACAAATCATGG         | 5'-CCATGATTTGTAC <u>A</u> CTACAACGCACAAGG          |
| <b>Y52E</b>   | 5'-GGAATAATTGCAGTGAGT <u>G</u> AGGAAGCTCGTGCATTTGG | 5'-CCAAATGCACGAGCTTCCT <u>C</u> ACTCACTGCAATTATTCC |
| <b>R55A</b>   | 5'-AGTTATGAAGCT <u>G</u> CTGCATTTGGAGTC            | 5'-GACTCCAAATGCAG <u>C</u> AGCTTCATAACT            |
| <b>R61A</b>   | 5'-GCATTTGGAGTCACT <u>G</u> CAAGTATGTGGGC          | 5'-GCCACATACTT <u>G</u> CAGTGACTCCAAATGC           |
| <b>S62A</b>   | 5'-GGAGTCACTAGAG <u>C</u> TATGTGGGCAGAT            | 5'-ATCTGCCACATAG <u>C</u> TCTAGTGACTCC             |
| <b>S62G</b>   | 5'-GGAGTCACTAGAG <u>G</u> TATGTGGGCAGATGGATGC      | 5'-ATCTGCCACATAC <u>C</u> TCTAGTGACTCC             |
| <b>R81C</b>   | 5'-TTCTACTGGCACAAGTT <u>T</u> GTGAGTCCCGTGGG       | 5'-CCCACGGGACTCAC <u>A</u> AACTTGTGCCAGTAGAA       |
| <b>E82D</b>   | 5'-TCTACTGGCACAAGTTCGTGA <u>T</u> TCCCGTGGGAA      | 5'-TTCCCACGGGA <u>A</u> TCACGAACTTGTGCCAGTAGA      |

**Supplementary Table 2** – Base substitution error spectrum of truncated pol  $\eta$  mutants as calculated from forward gap filling assay. Values given are the calculated frequency of errors per 10,000 bases copied. Rates relative to wild type are given in parentheses. Values in red indicate rates greater than 5 fold above wild type rate. Values in green are rate less than 5 fold the wild type rate. For changes that were not observed, rates were calculated as if a single instance was found and the values presented as less than or equal to ( $\leq$ ) values.

| Base | Mutation<br>From → To | Mispair<br>Template-dNTP | Error Rate ( $\times 10^{-4}$ ) |                   |                   |                   |                  |                  |                   |                   |                   |                   |
|------|-----------------------|--------------------------|---------------------------------|-------------------|-------------------|-------------------|------------------|------------------|-------------------|-------------------|-------------------|-------------------|
|      |                       |                          | WT                              | M14V              | Q38A              | Q38V              | Y52E             | R61A             | S62A              | S62G              | R81C              | E82D              |
| A    | A → C                 | A-dGTP                   | <b>72</b>                       | 65 (0.9X)         | 16 (0.2X)         | 53 (0.7X)         | 6 (0.1X)         | 22 (0.3X)        | 22 (0.3X)         | 35 (0.5X)         | 54 (0.8X)         | 26 (0.4X)         |
|      | A → G                 | A-dCTP                   | <b>60</b>                       | 27 (0.5X)         | 40 (0.7X)         | 21 (0.4X)         | 6 (0.1X)         | 11 (0.2X)        | 38 (0.6X)         | 35 (0.6X)         | 38 (0.6X)         | 16 (0.3X)         |
|      | A → T                 | A-dATP                   | <b>150</b>                      | 65 (0.4X)         | 88 (0.6X)         | 126 (0.8X)        | 6 (0.04X)        | 22 (0.1X)        | 22 (0.1X)         | 52 (0.3X)         | 87 (0.6X)         | 58 (0.4X)         |
|      | A → N                 | A-dNTP                   | <b>283</b>                      | 157 (0.6X)        | 144 (0.5X)        | 200 (0.7X)        | 18 (0.1X)        | 56 (0.2X)        | 49 (0.2X)         | 122 (0.4X)        | 179 (0.6X)        | 100 (0.4X)        |
| C    | C → A                 | C-dTTP                   | <b>5</b>                        | 18 (3.6X)         | 52 (10.4X)        | 13 (2.6X)         | $\leq 5$ (1.0X)  | $\leq 5$ (1.0X)  | 18 (3.6X)         | 19 (3.8X)         | $\leq 4$ (0.8X)   | 9 (1.8X)          |
|      | C → G                 | C-dCTP                   | <b>10</b>                       | $\leq 4$ (0.4X)   | 7 (0.7X)          | 9 (0.9X)          | 20 (2.0X)        | $\leq 5$ (0.5X)  | $\leq 4$ (0.4X)   | 5 (0.5X)          | 9 (0.9X)          | $\leq 4$ (0.4X)   |
|      | C → T                 | C-dATP                   | <b>63</b>                       | 44 (0.7X)         | 78 (1.2X)         | 26 (0.4X)         | 20 (0.3X)        | 18 (0.3X)        | 57 (0.9X)         | 75 (1.2X)         | 26 (0.4X)         | 17 (0.3X)         |
|      | C → N                 | A-dNTP                   | <b>78</b>                       | 62 (0.8X)         | 130 (1.7X)        | 47 (0.6X)         | 39 (0.5X)        | 18 (0.2X)        | 75 (1.0X)         | 99 (1.3X)         | 40 (0.5X)         | 26 (0.3X)         |
| G    | G → A                 | G-dTTP                   | <b>75</b>                       | 28 (0.4X)         | 100 (1.3X)        | 77 (1.0X)         | $\leq 6$ (0.1X)  | 6 (0.1X)         | 11 (0.1X)         | 54 (0.7X)         | 28 (0.4X)         | 22 (0.3X)         |
|      | G → C                 | G-dGTP                   | <b>13</b>                       | 17 (1.3X)         | 25 (1.9X)         | $\leq 5$ (0.4X)   | 6 (0.5X)         | $\leq 6$ (0.5X)  | 23 (1.8X)         | 18 (1.4X)         | 17 (1.3X)         | 11 (0.8X)         |
|      | G → T                 | G-dATP                   | <b>13</b>                       | 17 (1.3X)         | 42 (3.2X)         | 11 (0.8X)         | 6 (0.5X)         | 6 (0.5X)         | 6 (0.5X)          | 24 (1.8X)         | 11 (0.8X)         | 16 (1.2X)         |
|      | G → N                 | A-dNTP                   | <b>100</b>                      | 62 (0.6X)         | 167 (1.7X)        | 88 (0.9X)         | 13 (0.1X)        | 12 (0.1X)        | 40 (0.4X)         | 97 (1.0X)         | 57 (0.6X)         | 49 (0.5X)         |
| T    | T → A                 | T-dTTP                   | <b>20</b>                       | 22 (1.1X)         | 163 (8.2X)        | 38 (1.9X)         | 10 (0.5X)        | 23 (1.2X)        | 40 (2.0X)         | 24 (1.2X)         | 18 (0.9X)         | 21 (1.1X)         |
|      | T → C                 | T-dGTP                   | <b>385</b>                      | 335 (0.9X)        | 345 (0.9X)        | 457 (1.2X)        | 166 (0.4X)       | 164 (0.4X)       | 397 (1.0X)        | 297 (0.8X)        | 375 (1.0X)        | 235 (0.6X)        |
|      | T → G                 | T-dCTP                   | <b>24</b>                       | 26 (1.1X)         | 33 (1.4X)         | $\leq 4$ (0.2X)   | 24 (1.0X)        | 5 (0.2X)         | 9 (0.4X)          | 8 (0.3X)          | 31 (1.3X)         | 38 (1.6X)         |
|      | T → N                 | A-dNTP                   | <b>429</b>                      | 383 (0.9X)        | 540 (1.3X)        | 495 (1.2X)        | 200 (0.5X)       | 191 (0.4X)       | 445 (1.0X)        | 334 (0.8X)        | 423 (1.0X)        | 295 (0.7X)        |
|      |                       |                          | <b>227</b>                      | <b>173 (0.8X)</b> | <b>255 (1.1X)</b> | <b>215 (0.9X)</b> | <b>73 (0.3X)</b> | <b>74 (0.3X)</b> | <b>172 (0.8X)</b> | <b>169 (0.7X)</b> | <b>182 (0.8X)</b> | <b>122 (0.5X)</b> |
